# Supplementary material
Source: ML conference proceedings conference paper supplement (https://openreview.net/forum?id=71zCSP_HuBN)

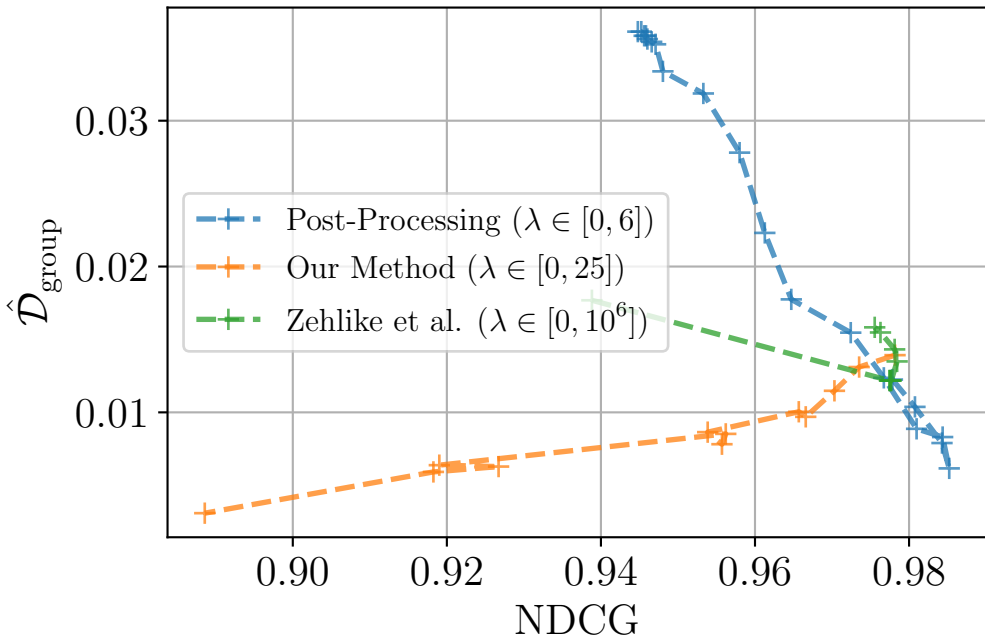

(c) Utility-Fairness trade-off

Supplement: supplementary_material [file attachment]

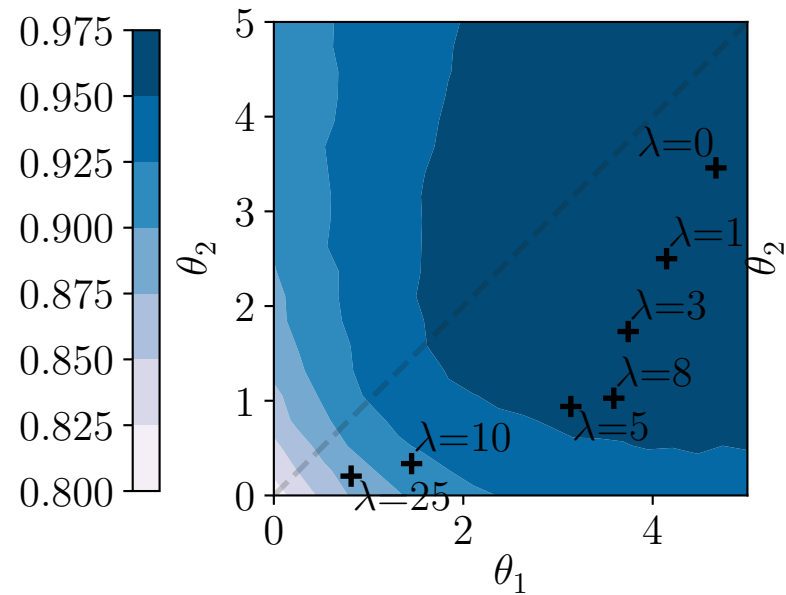

(a) NDCG

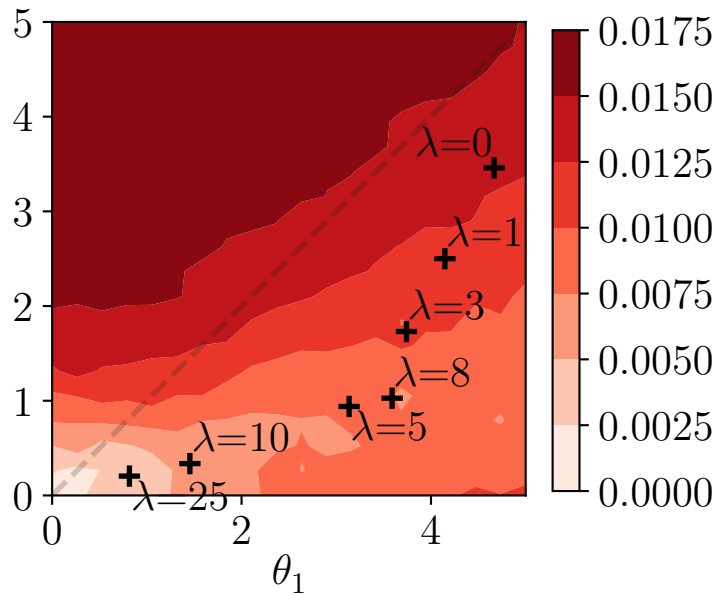

(b) Disparity

Supplement: supplementary_material [file attachment]

Baseline:  $\rho = 0$

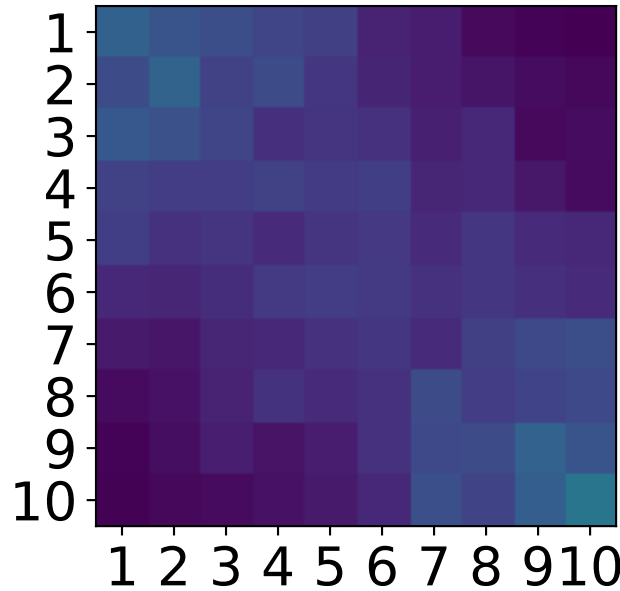Fair-PG-Rank:  $\lambda = 25$ 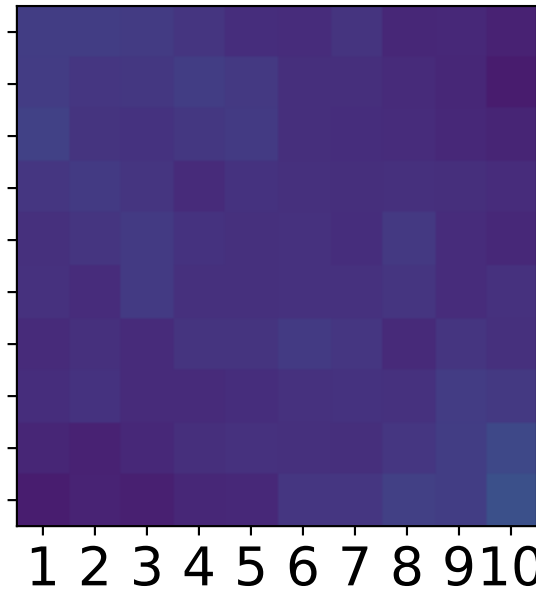

SenSTIR:  $\rho = .0003$

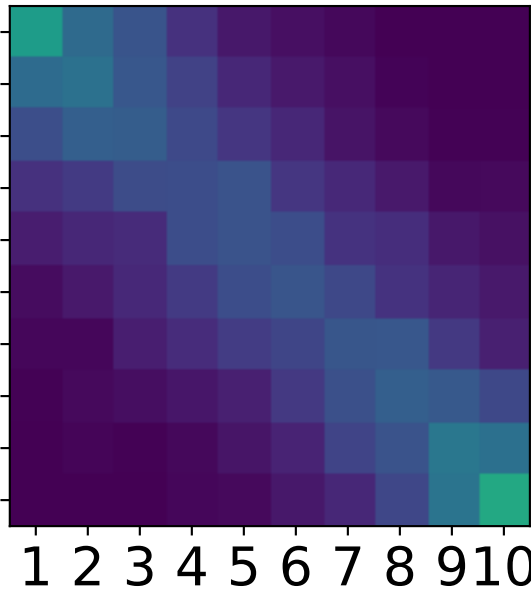

SenSTIR:  $\rho = .001$

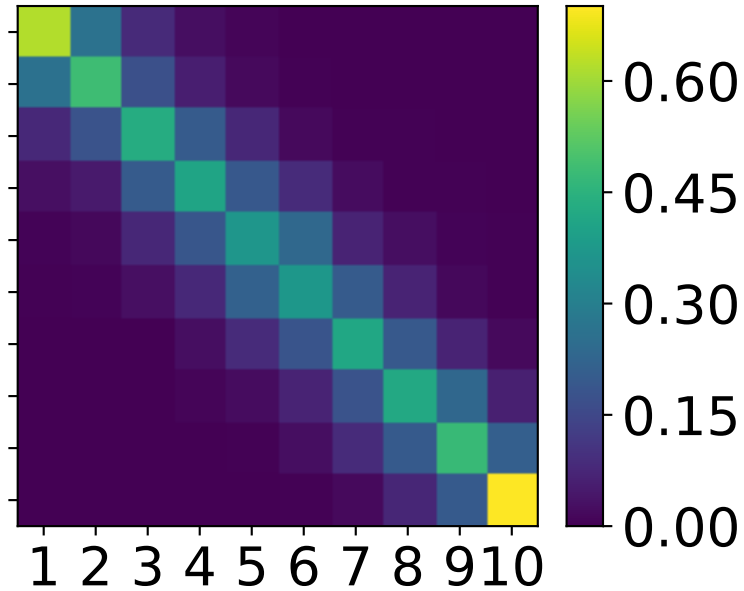

Supplement: supplementary_material [file attachment]

Baseline:  $\rho = 0$

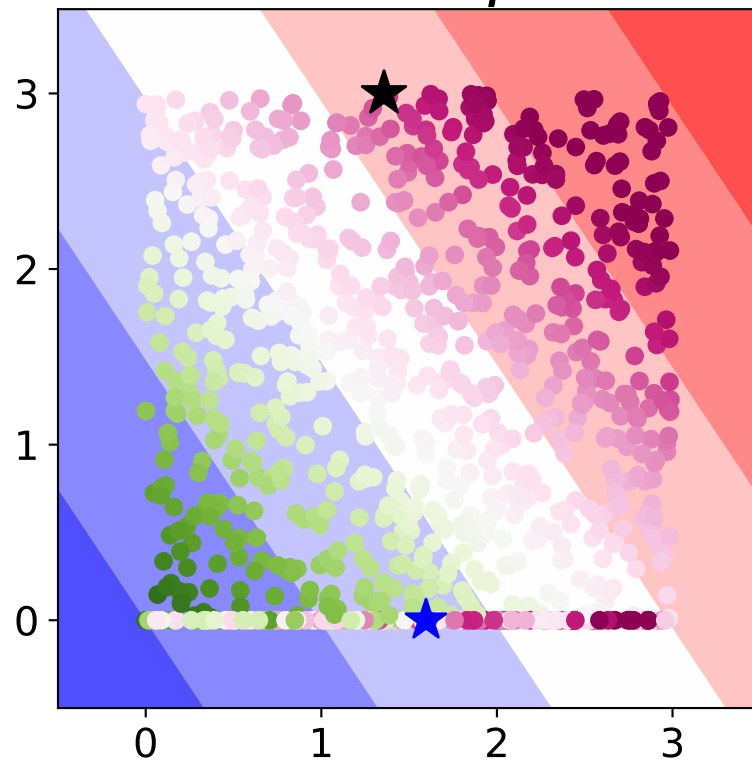

SenSTIR:  $\rho = .0003$

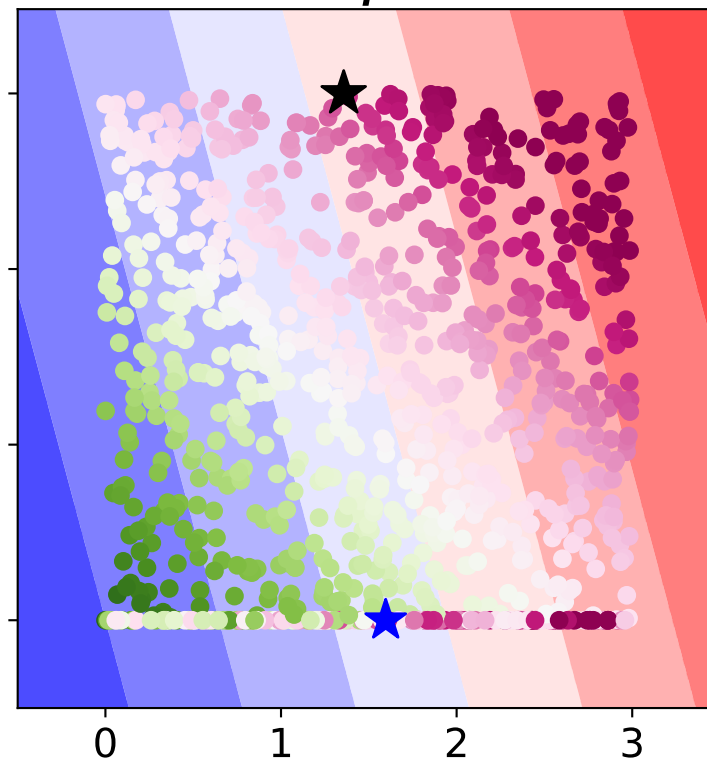

SenSTIR:  $\rho = .001$

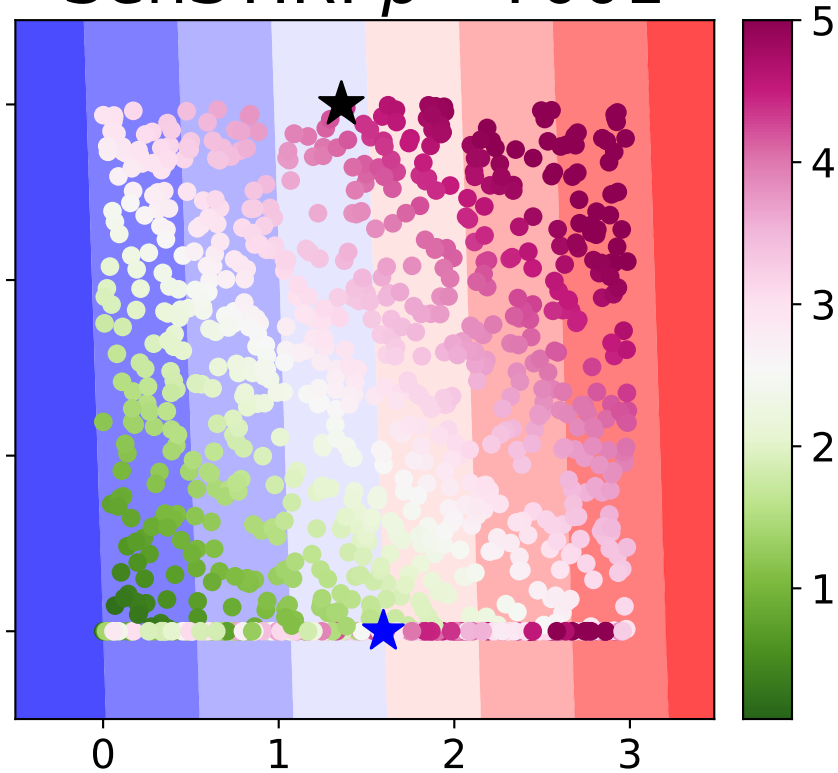

Supplement: supplementary_material [file attachment]
